# Supplementary material for: Size-controlled preparation of magnetic iron oxidenanocrystals within hyperbranched polymers and their magnetofection in vitro
Source: Royal Society of Chemistry journal article supplement (doi:10.1039/c1jm14079e), 2011-11-14
Supplement: c1jm14079e.pdf [file c1jm14079e.pdf]

**Supporting information available:**

**Size-controlled preparation of magnetic iron oxide  
nanocrystals within hyperbranched polymers and their  
magnetofection *in vitro***

**Yunfeng Shi,<sup>\*a</sup> Jimin Du,<sup>a</sup> Linzhu Zhou,<sup>b\*</sup> Xintao Li,<sup>a</sup> Yahui Zhou,<sup>a</sup> Lingling Li,<sup>a</sup> Xiuxiu  
Zang,<sup>a</sup> Xiaoyin Zhang<sup>a</sup>, Fuchao Pan,<sup>a</sup> Huanhuan Zhang,<sup>a</sup> Zongyao Wang<sup>a</sup> and Xinyuan  
Zhu<sup>b\*</sup>**

*<sup>1</sup>School of Chemistry and Chemical Engineering, Anyang Normal University, Anyang  
455000, People's Republic of China*

*<sup>2</sup>School of Chemistry and Chemical Engineering, State Key Laboratory of Metal Matrix  
Composites, Shanghai Jiao Tong University, 800 Dongchuan Road, Shanghai 200240,  
People's Republic of China*

\* To whom correspondence should be addressed. Tel.: +86-372-2900040; Fax:  
+86-372-2900040; E-mail: shiyunfeng2009@gmail.com; linzhuzhou@sjtu.edu.cn;  
xyzhu@sjtu.edu.cn.

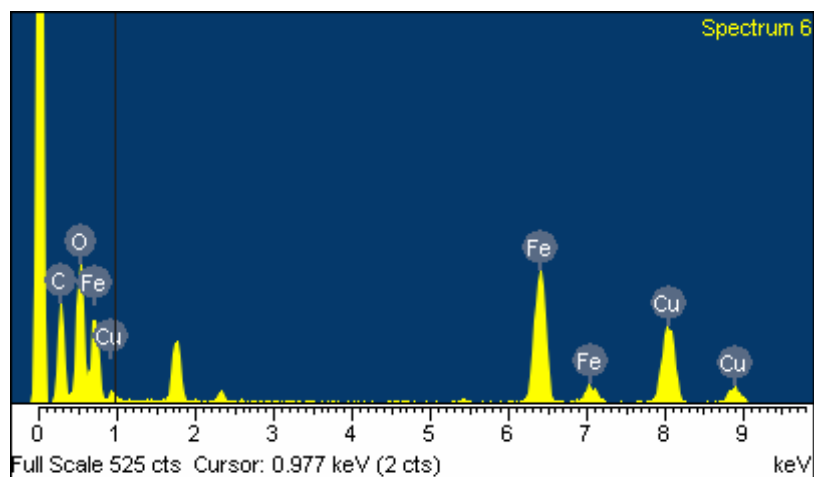

**Figure S1.** EDS of Mag-HPEI-1.25.

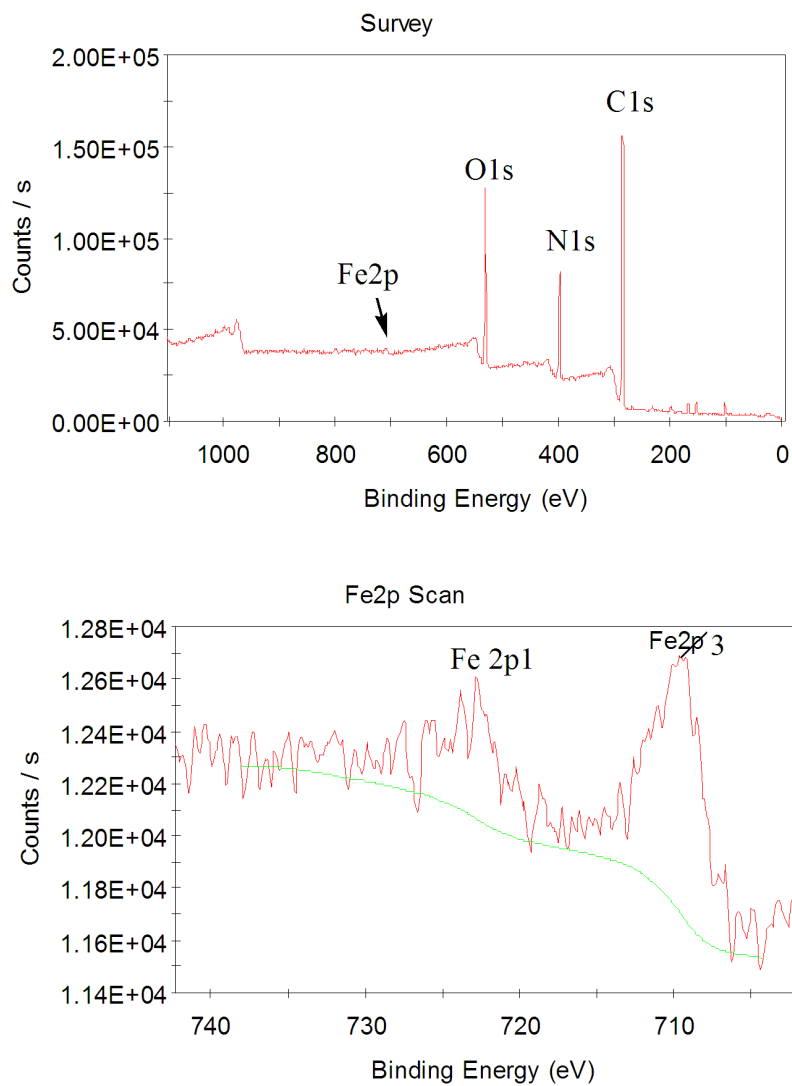

**Figure S2.** XPS spectra of Mag-HPEI-1.

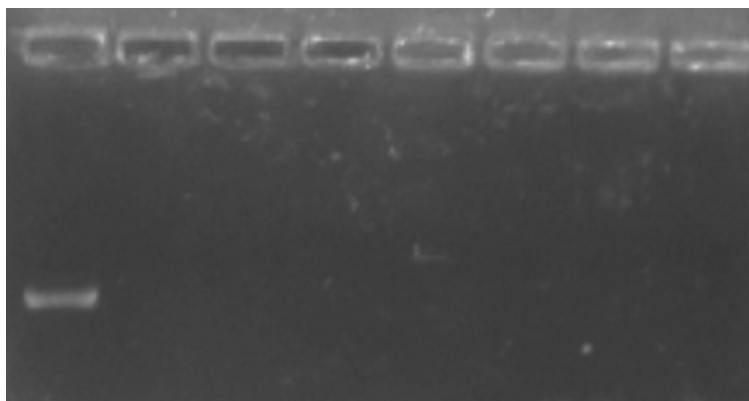

**Figure S3.** Determination of plasmid DNA condensation by gel retardation assay.

Plasmid DNA was complexed with Mag-HPEI-1 at various Fe/DNA weight ratios 0, 0.1, 0.2, 0.5, 0.75, 1, 1.5, and 2 from left to right and loaded into an agarose gel.

Complexation prevented DNA migration into gel.

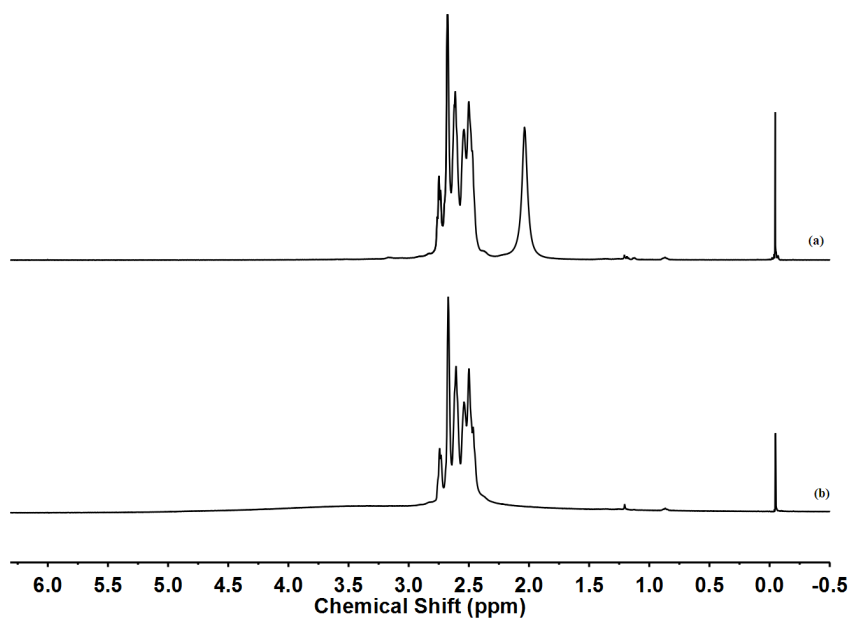

**Figure S4.** <sup>1</sup>H NMR spectra of (a) HPEI and (b) HPEI treated by H<sub>2</sub>O<sub>2</sub>.
